# Supplementary material
Source: ML conference proceedings conference paper supplement (https://proceedings.mlr.press/v54/huang17a.html)
Supplement: Supplementary file [file huang17a-supp.pdf]

## 7 Proof Roadmap

The key in proving Theorem 1 and 2 is to establish bounds on the primal-dual progress  $\Delta_p^t + \Delta_d^t - \Delta_p^{t-1} - \Delta_d^{t-1}$ . As intermediate steps, the two lemmas below bound the dual-progress  $\Delta_d^t - \Delta_d^{t-1}$  and the primal-progress  $\Delta_p^t - \Delta_p^{t-1}$  with respect to the primal variables  $\{\mathbf{z}^t\}$  and the optimal primal variables  $\{\bar{\mathbf{z}}^t\}$  at each iteration.

**Lemma 1** (Dual Progress). *The dual progress is upper bounded as*

$$\Delta_d^t - \Delta_d^{t-1} \leq -\eta(M\mathbf{z}^t)^T(M\bar{\mathbf{z}}^t). \quad (14)$$

**Lemma 2** (Primal Progress). *The primal progress is upper bounded as*

$$\begin{aligned} \Delta_p^t - \Delta_p^{t-1} &\leq \mathcal{L}(\mathbf{z}^{t+1}, \boldsymbol{\mu}^t) - \mathcal{L}(\mathbf{z}^t, \boldsymbol{\mu}^t) \\ &\quad + \eta\|M\mathbf{z}^t\|^2 - \eta\langle M\mathbf{z}^t, M\bar{\mathbf{z}}^t \rangle \end{aligned}$$

By combining results of Lemma 1 and 2, we obtain an intermediate upper bound on the primal-dual progress:

$$\begin{aligned} &\Delta_d^t - \Delta_d^{t-1} + \Delta_p^t - \Delta_p^{t-1} \\ &\leq \eta\|M\mathbf{z}^t - M\bar{\mathbf{z}}^t\|^2 - \eta\|M\bar{\mathbf{z}}^t\|^2 \\ &\quad + \mathcal{L}(\mathbf{z}^{t+1}, \boldsymbol{\mu}^t) - \mathcal{L}(\mathbf{z}^t, \boldsymbol{\mu}^t) \end{aligned} \quad (15)$$

The following four lemmas provide upper bounds on the three sub-terms in (15), i.e.,  $\|M\mathbf{z}^t - M\bar{\mathbf{z}}^t\|^2$ ,  $-\eta\|M\bar{\mathbf{z}}^t\|^2$ , and  $\mathcal{L}(\mathbf{z}^{t+1}, \boldsymbol{\mu}^t) - \mathcal{L}(\mathbf{z}^t, \boldsymbol{\mu}^t)$ , where the bounds on the last term are algorithm-dependent and therefore are tackled by Lemma 5 and Lemma 19 for Algorithm 1 and Algorithm 2 respectively.

**Lemma 3.**

$$\|M\mathbf{z}^t - M\bar{\mathbf{z}}^t\|^2 \leq \frac{2}{\rho}(\mathcal{L}(\mathbf{z}^t, \boldsymbol{\mu}^t) - \mathcal{L}(\bar{\mathbf{z}}^t, \boldsymbol{\mu}^t)). \quad (16)$$

**Lemma 4** (Hong and Luo 2012). *There is a constant  $\tau > 0$  such that*

$$\Delta_d(\boldsymbol{\mu}) \leq \tau\|M\bar{\mathbf{z}}(\boldsymbol{\mu})\|^2. \quad (17)$$

for any  $\boldsymbol{\mu}$  in the dual domain and any primal minimizer  $\bar{\mathbf{z}}(\boldsymbol{\mu})$  satisfying (13).

**Lemma 5.** *The descent amount of Augmented Lagrangian function produced by one pass of FCFW (in Algorithm 1) has*

$$\begin{aligned} &\mathcal{L}(\mathbf{z}^{t+1}, \boldsymbol{\mu}^t) - \mathcal{L}(\mathbf{z}^t, \boldsymbol{\mu}^t) \\ &\leq -\frac{m_{\mathcal{M}}}{2|\mathcal{F}|Q}(\mathcal{L}(\mathbf{z}^t, \boldsymbol{\mu}^t) - \mathcal{L}(\bar{\mathbf{z}}^t, \boldsymbol{\mu}^t)) \end{aligned} \quad (18)$$

where  $Q = \rho\|M\|^2$ .

**Lemma 6.** *The descent amount of Augmented Lagrangian function produced by iterations of Algorithm 2 has*

$$\begin{aligned} &\mathcal{L}(\mathbf{z}^{t+1}, \boldsymbol{\mu}^t) - \mathcal{L}(\mathbf{z}^t, \boldsymbol{\mu}^t) \\ &\leq \frac{-m_1}{Q_{max}}(\mathcal{L}(\mathbf{z}^t, \boldsymbol{\mu}^t) - \mathcal{L}(\bar{\mathbf{z}}^t, \boldsymbol{\mu}^t)) \end{aligned} \quad (19)$$

where  $Q_{max} = \max_{f \in \mathcal{F}} Q_f$  and

$$m_1 := \frac{1}{\max\{16\theta_1\Delta\mathcal{L}^0, 2\theta_1(1 + 4L_g^2)/\rho, 6\}} \quad (20)$$

is the generalized strong convexity constant for function  $\mathcal{L}(\cdot, \boldsymbol{\mu})$ . Here  $\Delta\mathcal{L}^0$  is a bound on  $\mathcal{L}(\mathbf{z}^0, \boldsymbol{\mu}^t) - \mathcal{L}(\bar{\mathbf{z}}^0, \boldsymbol{\mu}^t)$ ,  $L_g$  is local Lipschitz-continuous constant of the function  $g(\mathbf{x}) := \|\mathbf{x}\|^2$ , and  $\theta_1$  is the Hoffman constant depending on the geometry of optimal solution set.

Now we are ready to prove Theorem 1 and 2.

**Proof of Theorem 1.** Let  $\kappa = m_{\mathcal{M}}/(|\mathcal{F}|Q)$ . By lemma 5 and (15), we have

$$\begin{aligned} &\Delta_d^t - \Delta_d^{t-1} + \Delta_p^t - \Delta_p^{t-1} \\ &\leq \frac{-\kappa}{1 + \kappa}(\mathcal{L}(\mathbf{z}^t, \boldsymbol{\mu}^t) - \mathcal{L}(\bar{\mathbf{z}}^t, \boldsymbol{\mu}^t)) \\ &\quad + \frac{2\eta}{\rho}(\mathcal{L}(\mathbf{z}^t, \boldsymbol{\mu}^t) - \mathcal{L}(\bar{\mathbf{z}}^t, \boldsymbol{\mu}^t)) - \eta\|M\bar{\mathbf{z}}^t\|^2. \end{aligned} \quad (21)$$

Then by choosing  $\eta < \frac{\kappa\rho}{2(1+\kappa)}$ , we have guaranteed descent on  $\Delta_p + \Delta_d$  for each GDMM iteration. By choosing  $\eta \leq \frac{\kappa\rho}{4(1+\kappa)}$ , we have

$$\begin{aligned} &(\Delta_d^t + \Delta_p^t) - (\Delta_d^{t-1} + \Delta_p^{t-1}) \\ &\leq \frac{-\kappa}{2(1 + \kappa)}(\mathcal{L}(\mathbf{z}^t, \boldsymbol{\mu}^t) - \mathcal{L}(\bar{\mathbf{z}}^t, \boldsymbol{\mu}^t)) - \eta\|M\bar{\mathbf{z}}^t\|^2 \\ &\leq \frac{-\kappa}{2(1 + \kappa)}\Delta_d^t - \frac{\eta}{\tau}\Delta_d^t \\ &\leq -\min\left(\frac{\kappa}{2(1 + \kappa)}, \frac{\eta}{\tau}\right)(\Delta_p^t + \Delta_d^t) \end{aligned}$$

where the second inequality is from Lemma 4. We thus obtain a recursion of the form

$$\Delta_d^t + \Delta_p^t \leq \frac{1}{1 + \min(\frac{\kappa}{2(1+\kappa)}, \frac{\eta}{\tau})}(\Delta_d^{t-1} + \Delta_p^{t-1}),$$

which then leads to the conclusion.  $\square$

The proof of Theorem 2 is the same as above except that the definition of  $\kappa$  is changed to  $m_1/Q_{max}$  and Lemma 5 is replaced by Lemma 19.

## 8 Proof of Lemmas

### Proof of Lemma 1.

$$\begin{aligned}
 \Delta_d^t - \Delta_d^{t-1} &= \mathcal{L}(\bar{\mathbf{z}}^{t-1}, \boldsymbol{\mu}^{t-1}) - \mathcal{L}(\bar{\mathbf{z}}^t, \boldsymbol{\mu}^t) \\
 &\leq \mathcal{L}(\bar{\mathbf{z}}^t, \boldsymbol{\mu}^{t-1}) - \mathcal{L}(\bar{\mathbf{z}}^t, \boldsymbol{\mu}^t) \\
 &= \langle \boldsymbol{\mu}^{t-1} - \boldsymbol{\mu}^t, M\bar{\mathbf{z}}^t \rangle \\
 &= -\eta \langle M\mathbf{z}^t, M\bar{\mathbf{z}}^t \rangle
 \end{aligned}$$

where the first inequality follows from the optimality of  $\bar{\mathbf{z}}^{t-1}$  for the function  $\mathcal{L}(\mathbf{z}, \boldsymbol{\mu}^{t-1})$  defined by  $\boldsymbol{\mu}^{t-1}$ , and the last equality follows from the dual update (9).  $\square$

### Proof of Lemma 2.

$$\begin{aligned}
 &\Delta_p^t - \Delta_p^{t-1} \\
 &= \mathcal{L}(\mathbf{z}^{t+1}, \boldsymbol{\mu}^t) - \mathcal{L}(\mathbf{z}^t, \boldsymbol{\mu}^{t-1}) - (d(\boldsymbol{\mu}^t) - d(\boldsymbol{\mu}^{t-1})) \\
 &\leq \mathcal{L}(\mathbf{z}^{t+1}, \boldsymbol{\mu}^t) - \mathcal{L}(\mathbf{z}^t, \boldsymbol{\mu}^t) + \mathcal{L}(\mathbf{z}^t, \boldsymbol{\mu}^t) - \mathcal{L}(\mathbf{z}^t, \boldsymbol{\mu}^{t-1}) \\
 &\quad + (d(\boldsymbol{\mu}^{t-1}) - d(\boldsymbol{\mu}^t)) \\
 &\leq \mathcal{L}(\mathbf{z}^{t+1}, \boldsymbol{\mu}^t) - \mathcal{L}(\mathbf{z}^t, \boldsymbol{\mu}^t) + \eta \|M\mathbf{z}^t\|^2 - \eta \langle M\mathbf{z}^t, M\bar{\mathbf{z}}^t \rangle
 \end{aligned}$$

where the last inequality uses Lemma 1 on  $d(\boldsymbol{\mu}^{t-1}) - d(\boldsymbol{\mu}^t) = \Delta_d^t - \Delta_d^{t-1}$ .  $\square$

### Proof of Lemma 3. Introduce

$$\tilde{\mathcal{L}}(\mathbf{z}, \boldsymbol{\mu}) = h(\mathbf{z}) + G(M\mathbf{z}),$$

where

$$G(M\mathbf{z}) = \frac{\rho}{2} \|M\mathbf{z}\|^2,$$

and

$$h(\mathbf{z}) = \langle -\boldsymbol{\theta}, \mathbf{z} \rangle + \langle \boldsymbol{\mu}, M\mathbf{z} \rangle + \mathbf{I}_{\mathbf{z} \in \mathcal{M}}.$$

Here

$$\mathbf{I}_{\mathbf{z} \in \mathcal{M}} = \begin{cases} 0 & \mathbf{z} \in \mathcal{M}, \\ \infty & \text{otherwise.} \end{cases}$$

As feasibility is strictly enforced during primal updates, we have

$$\tilde{\mathcal{L}}(\bar{\mathbf{z}}^t, \boldsymbol{\mu}^t) = \mathcal{L}(\bar{\mathbf{z}}^t, \boldsymbol{\mu}^t), \quad \tilde{\mathcal{L}}(\mathbf{z}^t, \boldsymbol{\mu}^t) = \mathcal{L}(\mathbf{z}^t, \boldsymbol{\mu}^t). \quad (22)$$

As  $\bar{\mathbf{z}}^t$  is a critical point of  $\mathcal{L}(\mathbf{z}, \boldsymbol{\mu}^t)$ , and by definition,  $\mathcal{L}(\mathbf{z}, \boldsymbol{\mu}^t) \leq \tilde{\mathcal{L}}(\mathbf{z}, \boldsymbol{\mu}^t)$ , we obtain,

$$0 \in \partial_{\mathbf{z}} \tilde{\mathcal{L}}(\bar{\mathbf{z}}^t, \boldsymbol{\mu}^t) = \partial h(\bar{\mathbf{z}}^t) + M^T \nabla G(M\bar{\mathbf{z}}^t).$$

Note that  $h(\cdot)$  is convex, it follows that

$$h(\mathbf{z}^t) - h(\bar{\mathbf{z}}^t) \geq \langle \mathbf{v}, \mathbf{z}^t - \bar{\mathbf{z}}^t \rangle, \quad \forall \mathbf{v} \in \partial h(\bar{\mathbf{z}}^t). \quad (23)$$

Moreover,

$$\begin{aligned}
 &G(M(\mathbf{z}^t)) - G(M(\bar{\mathbf{z}}^t)) \\
 &= \frac{\rho}{2} (\|M\mathbf{z}^t\|^2 - \|M\bar{\mathbf{z}}^t\|^2) \\
 &= \frac{\rho}{2} (\mathbf{z}^t - \bar{\mathbf{z}}^t)^T M^T M (\mathbf{z}^t + \bar{\mathbf{z}}^t) \\
 &= \rho (\mathbf{z}^t - \bar{\mathbf{z}}^t)^T M^T M \bar{\mathbf{z}}^t + \frac{\rho}{2} (\mathbf{z}^t - \bar{\mathbf{z}}^t)^T M^T M (\mathbf{z}^t - \bar{\mathbf{z}}^t) \\
 &= \langle M^T \nabla G(M\bar{\mathbf{z}}^t), \mathbf{z}^t - \bar{\mathbf{z}}^t \rangle + \frac{\rho}{2} \|M\mathbf{z}^t - M\bar{\mathbf{z}}^t\|^2.
 \end{aligned} \quad (25)$$

Combing (22), (23), and (25), we arrive at

$$\mathcal{L}(\mathbf{z}^t, \boldsymbol{\mu}^t) - \mathcal{L}(\bar{\mathbf{z}}^t, \boldsymbol{\mu}^t) \geq \frac{\rho}{2} \|M(\mathbf{z}^t) - M(\bar{\mathbf{z}}^t)\|^2. \quad \square$$

**Proof of Lemma 4.** This is a lemma adapted from [22]. Since our primal objective (2) is a linear function with each block of primal variables  $\mathbf{x}_i$  (or  $\mathbf{y}_f$ ) constrained in a simplex domain, it satisfies the *assumptions*  $A(a) - A(e)$  and  $A(g)$  in [22]. Then Lemma 3.1 of [22] guarantees that, as long as  $\|\nabla d(\boldsymbol{\mu})\|$  is always bounded, there is a constant  $\tau > 0$  s.t.

$$\Delta_d(\boldsymbol{\mu}) \leq \tau \|\nabla d(\boldsymbol{\mu})\|^2 = \|M\bar{\mathbf{z}}(\boldsymbol{\mu})\|^2$$

for all  $\boldsymbol{\mu}$  in the dual domain. Note our problem satisfies the condition of bounded gradient magnitude since

$$\begin{aligned}
 \|\nabla d(\boldsymbol{\mu})\| &= \|M\bar{\mathbf{z}}(\boldsymbol{\mu})\| \leq \|M\bar{\mathbf{z}}(\boldsymbol{\mu})\|_1 \\
 &\leq \|M\|_1 \|\bar{\mathbf{z}}(\boldsymbol{\mu})\|_1 \leq (\max_f |\mathcal{Y}_f|) (|\mathcal{F}| + |\mathcal{V}|)
 \end{aligned}$$

where the last inequality is because each block of variables in  $\bar{\mathbf{z}}(\boldsymbol{\mu})$  lie in a simplex domain.  $\square$

**Proof of Lemma 5.** Recall that the Augmented Lagrangian  $\mathcal{L}(\mathbf{z}, \boldsymbol{\mu})$  is of the form

$$\mathcal{L}(\mathbf{z}, \boldsymbol{\mu}) = \langle -\boldsymbol{\theta} + M^T \boldsymbol{\mu}, \mathbf{z} \rangle + G(M\mathbf{z}), \quad \forall i \in \mathcal{V} \quad (26)$$

where  $M$  is the matrix that encodes all constraints of the form

$$M_{if} \mathbf{z}_f - \mathbf{z}_i = [ M_{if} \quad -I_i ] \begin{bmatrix} \mathbf{z}_f \\ \mathbf{z}_i \end{bmatrix} = \mathbf{0}.$$

and function  $G(\mathbf{w}) = \frac{\rho}{2} \|\mathbf{w}\|^2$  is strongly convex with parameter  $\rho$ . Let

$$H(\mathbf{z}) := \mathcal{L}(\mathbf{z}, \boldsymbol{\mu}). \quad (27)$$

Since we are minimizing the function subject to a convex, polyhedral domain  $\mathcal{M}$ , by Theorem 10 of [23], we have the *generalized geometrical strong convexity* constant  $m_{\mathcal{M}}$  of the form

$$m_{\mathcal{M}} := m(PWidth(\mathcal{M}))^2 \quad (28)$$

where  $PWidth(\mathcal{M}) > 0$  is the pyramidal width of the simplex domain  $\mathcal{M}$  and  $m$  is the *generalized strong convexity* constant of function (26) (defined by Lemma 9 of [23]). By definition of the geometric strong convexity constant, we have

$$H(\mathbf{z}) - H^* \leq \frac{g_{FW}^2}{2m_{\mathcal{M}}} \quad (29)$$

from (23) in [23], where  $g_{FW} := \langle \nabla H(\mathbf{z}), \mathbf{v}_{FW} - \mathbf{v}_A \rangle$ .  $\mathbf{v}_{FW}$  is the greedy Frank-Wolfe (FW) direction

$$\mathbf{v}_{FW} := \arg \min_{\mathbf{v} \in \mathcal{M}} \langle \nabla H(\mathbf{z}), \mathbf{v} \rangle \quad (30)$$

and  $\mathbf{v}_A$  is the away direction

$$\mathbf{v}_A := \arg \max_{\mathbf{v} \in \mathcal{M}} \langle \nabla \tilde{H}(\mathbf{z}), \mathbf{v} \rangle \quad (31)$$

where

$$\nabla_k \tilde{H}(\mathbf{z}) = \begin{cases} \nabla_k H(\mathbf{z}), & z_k \neq 0 \\ -\infty, & o.w. \end{cases}$$

Then let  $m = |\mathcal{F}|$  be the number of factors. For each inner iteration  $s$  of the Fully-Corrective FW, by minimizing subproblem (5) w.r.t. an active set that contains the FW direction and also the away direction (by the definition (31)), we have, for any  $\forall \gamma \in [0, 1]$ ,

$$H(\mathbf{z}^{t+1}) - H(\mathbf{z}^t) \leq \gamma g_{FW}^t + mQ\gamma^2. \quad (32)$$

Suppose the minimizer of (32)  $\gamma^* = -\frac{g_{FW}^t}{2mQ}$  has  $\gamma^* < 1$ , we have

$$H(\mathbf{z}^{t+1}) - H(\mathbf{z}^t) \leq -\frac{g_{FW}^t{}^2}{4mQ} \quad (33)$$

Otherwise, let  $\gamma^* = 1$ , we have

$$\begin{aligned} & H(\mathbf{z}^{t+1}) - H(\mathbf{z}^t) \\ & \leq g_{FW}^t + mQ \leq \frac{g_{FW}^t}{2} < -\frac{g_{FW}^t{}^2}{2mQ} \leq -\frac{g_{FW}^t{}^2}{4mQ}, \end{aligned}$$

where the second inequality holds since  $-\frac{g_{FW}^t}{2Qm} \geq 1$ .

Combining with the error bound (29), we have

$$H(\mathbf{z}^{t+1}) - H(\mathbf{z}^t) \leq -\frac{m_{\mathcal{M}}(H(\mathbf{z}^t) - H^*)}{2mQ}. \quad (34)$$

□

### Proof of Lemma 19.

For problem of the form (13), the optimal solution is profiled by the polyhedral set  $\mathcal{S} := \{\mathbf{z} \mid M\mathbf{z} = \mathbf{t}^*, \Delta^T \mathbf{z} = s^*, \mathbf{z} \in \mathcal{M}\}$  for some  $\mathbf{t}^*, s^*$ . Denoting  $\bar{\mathbf{z}} := \Pi_{\mathcal{S}}(\mathbf{z})$ , we can bound the distance of any feasible point  $\mathbf{z}$  to its projection  $\Pi_{\mathcal{S}}(\mathbf{z})$  to set  $\mathcal{S}$  by

$$\begin{aligned} \|\bar{\mathbf{z}} - \mathbf{z}\|_{2,1}^2 &= \left( \sum_{f \in \mathcal{F}} \|\bar{z}_f - z_f\|_2 \right)^2 \\ &\leq \theta_1 \left( \|M\mathbf{z} - \mathbf{t}^*\|^2 + \|\Delta^T \mathbf{z} - s^*\|^2 \right) \end{aligned} \quad (35)$$

where  $\theta_1$  is a constant depending on the set  $\mathcal{S}$ , using the Hoffman's inequality [37].

Then for each iteration  $t$  of the Algorithm 2, consider the descent amount produced by the update w.r.t. the selected factor satisfying (11). We have

$$\begin{aligned} & H(\mathbf{z}^{t+1}) - H(\mathbf{z}^t) \\ & \leq \min_{\mathbf{z}^t + \mathbf{d} \in \mathcal{M}} \langle \nabla_{\mathbf{z}^t} H, \mathbf{d} \rangle + \frac{Q_{\max}}{2} \|\mathbf{d}\|^2 \\ & = \min_{\mathbf{z}^t + \mathbf{d} \in \mathcal{M}} \sum_{f \in \mathcal{F}} \langle \nabla_{\mathbf{z}^t} H, \mathbf{d}_f \rangle + \frac{Q_{\max}}{2} \left( \sum_{f \in \mathcal{F}} \|\mathbf{d}_f\| \right)^2 \end{aligned} \quad (36)$$

where the second equality is from the definition (11) of  $f^*$ .

Then we have

$$\begin{aligned} & H(\mathbf{z}^{t+1}) - H(\mathbf{z}^t) \\ & \leq \min_{\mathbf{z}^t + \mathbf{d} \in \mathcal{M}} \left( \sum_{f \in \mathcal{F}} \langle \nabla_{\mathbf{z}^t} H, \mathbf{d}_f \rangle + \frac{Q_{\max}}{2} \left( \sum_{f \in \mathcal{F}} \|\mathbf{d}_f\| \right)^2 \right) \\ & \leq \min_{\mathbf{z}^t + \mathbf{d} \in \mathcal{M}} H(\mathbf{z}^t + \mathbf{d}) - H(\mathbf{z}^t) + \frac{Q_{\max}}{2} \left( \sum_{f \in \mathcal{F}} \|\mathbf{d}_f\| \right)^2 \\ & \leq \min_{\beta \in [0,1]} H(\mathbf{z}^t + \beta(\bar{\mathbf{z}}^t - \mathbf{z}^t)) - H(\mathbf{z}^t) \\ & \quad + \frac{Q_{\max}\beta^2}{2} \left( \sum_{f \in \mathcal{F}} \|\bar{\mathbf{z}}_f^t - \mathbf{z}_f^t\| \right)^2 \\ & \leq \min_{\beta \in [0,1]} \beta(H(\bar{\mathbf{z}}^t) - H(\mathbf{z}^t)) + \frac{Q_{\max}\beta^2}{2} \|\bar{\mathbf{z}}^t - \mathbf{z}^t\|_{2,1}^2 \end{aligned} \quad (37)$$

where  $\bar{\mathbf{z}}^t = \Pi_{\mathcal{S}}(\mathbf{z}^t)$  is the projection of  $\mathbf{z}^t$  to the optimal solution set  $\mathcal{S}$ . The second and last inequality is due to convexity, and the third inequality is due to a confinement of optimization domain. Then let  $L_g$  be the local Lipschitz-continuous constant of function  $G(M\mathbf{z}) = \frac{\rho}{2} \|M\mathbf{z}\|^2$  in the bounded domain of  $M\mathbf{z}$ . We discuss two cases in the following.

**Case 1:**  $4L_g^2 \|M\mathbf{z}^t - \mathbf{t}^*\|^2 < (\Delta^T \mathbf{z}^t - s^*)^2$ .

In this case, we have

$$\begin{aligned} \|\mathbf{z}^t - \bar{\mathbf{z}}^t\|_{2,1}^2 &\leq \theta_1 (\|M\mathbf{z}^t - \mathbf{t}^*\|^2 + (\Delta^T \mathbf{z}^t - s^*)^2) \\ &\leq \theta_1 \left( \frac{1}{L_g^2} + 1 \right) (\Delta^T \mathbf{z}^t - s^*)^2 \\ &\leq 2\theta_1 (\Delta^T \mathbf{z}^t - s^*)^2, \end{aligned} \quad (38)$$

and

$$|\Delta^T \mathbf{z}^t - s^*| \geq 2L_g \|M\mathbf{z}^t - \mathbf{t}^*\| \geq 2|G(M\mathbf{z}^t) - G(\mathbf{t}^*)|$$

by the definition of Lipschitz constant  $L_g$ . Note  $\Delta^T \mathbf{z}^t - s^*$  is non-negative since otherwise,  $H(\mathbf{z}^t) - H^* = G(M\mathbf{z}^t) - G(\mathbf{t}^*) + (\Delta^T \mathbf{z}^t - s^*) \leq |G(M\mathbf{z}^t) - G(\mathbf{t}^*)| - |\Delta^T \mathbf{z}^t - s^*| \leq -\frac{1}{2} |\Delta^T \mathbf{z}^t - s^*| < 0$ , which leads to contradiction. Therefore, we have

$$\begin{aligned} & H(\mathbf{z}^t) - H^* \\ & = G(M\mathbf{z}^t) - G(\mathbf{t}^*) + (\Delta^T \mathbf{z}^t - s^*) \\ & \geq -|G(M\mathbf{z}^t) - G(\mathbf{t}^*)| + (\Delta^T \mathbf{z}^t - s^*) \\ & \geq \frac{1}{2} (\Delta^T \mathbf{z}^t - s^*). \end{aligned} \quad (39)$$

Combining (37), (38) and (39), we have

$$\begin{aligned} & H(\mathbf{z}^{t+1}) - H(\mathbf{z}^t) \\ & \leq \min_{\beta \in [0,1]} -\frac{\beta}{2}(\Delta^T \mathbf{z}^t - s^*) + \frac{2Q_{max}\theta_1\beta^2}{2}(\Delta^T \mathbf{z}^t - s^*)^2 \\ & = \begin{cases} -1/(16Q_{max}\theta_1) & , 1/(4\rho\theta_1(\Delta^T \mathbf{z}^t - s^*)) \leq 1 \\ -\frac{1}{4}(\Delta^T \boldsymbol{\alpha}^s - s^*) & , o.w. \end{cases} \end{aligned}$$

Furthermore, we have

$$-\frac{1}{16Q_{max}\theta_1} \leq -\frac{1}{16Q_{max}\theta_1(H^0 - H^*)} (H(\mathbf{z}^t) - H^*)$$

where  $H^0 = H(\mathbf{z}^0)$ , and

$$-\frac{1}{4}(\Delta^T \mathbf{z}^t - s^*) \leq -\frac{1}{6}(H(\mathbf{z}^t) - H^*)$$

since  $H(\mathbf{z}^t) - H^* \leq |G(M\mathbf{z}^t) - G(\mathbf{t}^*)| + \Delta^T \mathbf{z}^t - s^* \leq \frac{3}{2}(\Delta^T \mathbf{z}^t - s^*)$ . In summary, for Case 1 we obtain

$$H(\mathbf{z}^{t+1}) - H^* \leq (1 - \frac{m_0}{Q_{max}}) (H(\mathbf{z}^t) - H^*) \quad (40)$$

where

$$m_0 = \frac{1}{\max\{16\theta_1(H^0 - H^*), 6\}}. \quad (41)$$

**Case 2:**  $4L_g^2\|M\mathbf{z}^t - \mathbf{t}^*\|^2 \geq (\Delta^T \mathbf{z}^t - s^*)^2$ .

In this case, we have

$$\|\bar{\mathbf{z}}^t - \mathbf{z}^t\|^2 \leq \theta_1 (1 + 4L_g^2) \|M\mathbf{z}^t - \mathbf{t}^*\|^2, \quad (42)$$

and by strong convexity of  $G(\cdot)$ ,

$$\begin{aligned} & H(\mathbf{z}^t) - H^* \geq \\ & \Delta^T (\mathbf{z}^t - \mathbf{z}^*) + \nabla G(\mathbf{t}^*)^T M (\bar{\mathbf{z}}^t - \mathbf{z}^t) + \frac{\rho}{2} \|M\mathbf{z}^t - \mathbf{t}^*\|^2. \end{aligned}$$

Now let  $h(\boldsymbol{\alpha})$  be a function that takes value 0 when  $\mathbf{z}$  is feasible and takes value  $\infty$  otherwise. Adding inequality  $0 = h(\mathbf{z}^t) - h(\bar{\mathbf{z}}^t) \geq \langle \boldsymbol{\sigma}^*, \mathbf{z}^t - \bar{\mathbf{z}}^t \rangle$  for some  $\boldsymbol{\sigma}^* \in \partial h(\bar{\mathbf{z}}^t)$  to the above gives

$$H(\mathbf{z}^t) - H^* \geq \frac{\rho}{2} \|M\mathbf{z}^t - \mathbf{t}^*\|^2 \quad (43)$$

since  $\boldsymbol{\sigma}^* + \Delta + \nabla G(\mathbf{t}^*)^T M = \boldsymbol{\sigma}^* + \nabla H(\mathbf{z}^t) = 0$ . Combining (37), (42), and (43), we obtain

$$\begin{aligned} & H(\mathbf{z}^{t+1}) - H(\mathbf{z}^t) \\ & \leq \min_{\beta \in [0,1]} -\beta(H(\mathbf{z}^t) - H^*) + \frac{\theta_1(1 + 4L_g^2)Q_{max}\beta^2}{2\rho} (H(\mathbf{z}^t) - H^*) \\ & = -\frac{\rho}{2\theta_1(1 + 4L_g^2)Q_{max}} (H(\mathbf{z}^t) - H^*) \end{aligned} \quad (44)$$

Combining results of Case 1 (40) and Case 2 (44), we have

$$H(\mathbf{z}^{t+1}) - H(\mathbf{z}^t) \leq -\frac{m_1}{Q_{max}} (H(\mathbf{z}^t) - H^*), \quad (45)$$

where

$$m_1 = \frac{1}{\max\{16\theta_1\Delta\mathcal{L}^0, 2\theta_1(1 + 4L_g^2)/\rho, 6\}}$$

This leads to the conclusion.  $\square$

## 9 Active set size statistics for all experiments

| Dataset        | $ \mathcal{F} $   | $\mathbb{E}_t \mathcal{A}_{\mathcal{F}}^t $ |
|----------------|-------------------|---------------------------------------------|
| MultiLabel     | 7544670           | 6128.2                                      |
| Dataset        | $ \mathcal{Y}_f $ | $\mathbb{E}_{t,f} \mathcal{A}_f^t $         |
| Segmentation   | 441               | 4.9                                         |
| ImageAlignment | 6889              | 2.4                                         |
| Protein        | 163216            | 12.7                                        |
| GraphMatching  | 1069156           | 1.66                                        |

Table 3: Run time statistics for GDMM active set. For multilabel dataset, we use Algorithm 2, thus  $|\mathcal{F}|$  and  $\mathbb{E}_t|\mathcal{A}_{\mathcal{F}}^t|$  are compared, where  $\mathbb{E}_t|\mathcal{A}_{\mathcal{F}}^t|$  is the expected size of  $\mathcal{A}_{\mathcal{F}}$  over all iterations. For other datasets, we use Algorithm 1, thus  $|\mathcal{Y}_f|$  and  $\mathbb{E}_{t,f}|\mathcal{A}_f^t|$  are compared, the latter is the expected size of  $\mathcal{A}_f$  over all iterations and bigram factors.
